# Supplementary material for: Metallosupramolecular polymers formed with silver(i) ions in aqueous solution
Source: Royal Society of Chemistry journal article supplement (doi:10.1039/d1nj05146f), 2022-01-01
Supplement: d1nj05146f1.pdf [file d1nj05146f1.pdf]

**Electronic Supplementary Material (ESI) for New Journal of Chemistry**

Supporting Information

**Metallosupramolecular polymers formed with silver(I) ion in aqueous solution**

Chenxing Li,<sup>a,†</sup> Mirae Ok,<sup>a,†</sup> Heekyoung Choi<sup>a</sup> and Jong Hwa Jung <sup>a,\*</sup>

*Contents*

|                                               |            |
|-----------------------------------------------|------------|
| <i>Methods</i> .....                          | <i>S2</i>  |
| <i>Material synthesis</i> .....               | <i>S3</i>  |
| <i>Supplementary Scheme and Figures</i> ..... | <i>S4</i>  |
| <i>References</i> .....                       | <i>S11</i> |

## Methods

**General characterization.** The  $^1\text{H}$  and  $^{13}\text{C}$  NMR spectra were taken on a Bruker DRX 300, and Bruker DRX 500. Mass spectroscopy samples were analyzed on a JEOL JMS-700 mass spectrometer. The high resolution mass spectra (HR MS) were measured by electrospray ionization (ESI) with a micro TOF Focus spectrometer from SYNAPT G2 (Waters, U.K.). A UV-visible spectrophotometer (Thermo scientific Evolution 600) was used to obtain the absorption spectra. IR spectra were observed over the range  $500\text{-}4000\text{ cm}^{-1}$ , with a Thermo scientific Nicolet iS 10 instrument.

**Preparation of silver complexes.** Different concentrations (0, 0.5 and 1.0 equiv.) of  $\text{Ag}^+$  solution (water) were added to the ligand **L** (10.9 mM) solution in a mixture of DMSO and  $\text{H}_2\text{O}$  (1:1 v/v).

**SEM observation.** FE-SEM images were observed using a JEOL (JSM-7900F). The images of samples using an accelerating voltage 5 kV and an emission current of  $8\mu\text{A}$ . Samples were prepared by dropping dilute solution of supramolecular nanostructure formed in a mixture of DMSO and  $\text{H}_2\text{O}$  (1:1 v/v) on glasses following by spinning, drying and coating them with a thin layer of Pt to increase the contrast.

**Circular dichroism studies.** The CD and UV-vis spectra were recorded on a Jasco J-815 CD spectrophotometer. CD and UV-vis spectra were determined over the range of 200-500 nm using a quartz cell with 0.1 mm path length. Scans were taken at rate of 200 nm/min with a sampling interval of 0.5 nm and response time of 0.5s. The scans were acquired for the supramolecular nanostructure directly at 25 °C.

**Calculation of thermodynamic parameter.** The thermodynamic parameters governing the supramolecular aggregation of **L** were obtained by the global fitting of the melting curves. This global fitting is performed by using the equilibrium (EQ) model reported by ten Eikelder and coworkers.<sup>1</sup> The values for the elongation enthalpy ( $\Delta H_e$ ) and the entropy ( $\Delta S_e$ ), and elongation binding constant ( $K_e$ ) used in the cooperative supramolecular polymerization models were determined by the global fitting of the heating curves,<sup>2-4</sup> which were obtained by plotting the degree of aggregation ( $\alpha_{\text{agg}}$ ) of **L** (13 mM) without and with  $\text{AgNO}_3$  (0.5 and 1.0 equiv.) at 345 nm against temperature with heating experiments. An elongation binding constant ( $K_e$ ) for aggregation at 293 K was estimated according to eq. 1, from which the enthalpy change ( $\Delta H$ ), and the entropy change ( $\Delta S$ ) were determined:

$$K_e = e^{-(\Delta H_e - T\Delta S_e)/RT} \quad (\text{eq. 1})$$

## Material synthesis

**L** was synthesized according to the procedure shown in Scheme S1. All chemical reagents were purchased commercially without further purification, unless otherwise noted.

**Synthesis of Compound L2.** (*R*)-(-)-2-amino-1-propanol (0.28 g, 3.7 mmol) was put into a stirred suspension of powdered KOH (1.05 g, 18.7 mmol) in dry DMSO (20 mL) at 60 °C. After 30 min, 4'-chloro-2,2':6',2''-terpyridine (1.00 g, 3.7 mmol) was put into the mixture. The mixture was then stirred for 4 h at 70 °C and poured into 600 mL of distilled water thereafter. CH<sub>2</sub>Cl<sub>2</sub> (3 × 200 mL) was used to extract the aqueous phase. Residual water in dichloromethane was dried over Na<sub>2</sub>SO<sub>4</sub> and CH<sub>2</sub>Cl<sub>2</sub> was removed in vacuum, and the desired product was purified by recrystallization with ethyl acetate to give 0.72 g (72%) of **L2**. Mp = 118.3 °C; IR (KBr pellet): 3375, 2964, 2926, 2846, 1577, 1565, 1473, 1439, 1403, 1353, 1204, 799 cm<sup>-1</sup>; <sup>1</sup>H NMR (300 MHz, CDCl<sub>3</sub>): δ 8.70 (tdd, *J* = 4.8, 1.8, 0.9 Hz, 2H), 8.62 (dt, *J* = 8.0, 1.1 Hz, 2H), 8.02 (s, 2H), 7.84 (td, *J* = 7.7, 1.8 Hz, 2H), 7.33 (ddd, *J* = 7.4, 4.8, 1.2 Hz, 2H), 4.14 (dd, *J* = 9.0, 4.1 Hz, 1H), 3.94 (dd, *J* = 9.1, 7.6 Hz, 1H), 3.41 (dddd, *J* = 10.6, 7.6, 6.6, 4.2 Hz, 1H), 1.21 (d, *J* = 6.5 Hz, 3H); <sup>13</sup>C NMR (125 MHz, DMSO-d<sub>6</sub>): δ 167.2, 157.1, 155.3, 149.7, 137.9, 125.0, 121.3, 107.3, 75.1, 46.2, 20.43; HR-Mass (*m/z*) calculated for C<sub>18</sub>H<sub>18</sub>N<sub>4</sub>O [M]<sup>+</sup>: 306.3690, Found [M]<sup>+</sup>: 306.3690.

**Synthesis of Compound L.** In a two neck flask, **L2** (0.50 g, 1.64 mmol) and TEA (0.1 mL, 0.72 mmol) were poured into dry CH<sub>2</sub>Cl<sub>2</sub> (10 mL). After cooling the solution in an ice bath and magnetically stirring the solution, decanoyl chloride (0.13 mL, 0.78 mmol) was added dropwise for reactions. The reactant was stirred for 3 h at room temperature. The crude product was purified by silica gel column chromatography (DCM / MeOH 97 : 3 v/v as the eluent) to give a white crystalline solid **L** in 47.44% yield (0.217 g). Mp = 235 °C; IR (ATR): 3297, 2917, 2849, 1637, 1583, 1534, 1468, 1443, 1405, 1359, 1197, 1034, 868, 792, 741, 622 cm<sup>-1</sup>; <sup>1</sup>H NMR (300 MHz, CDCl<sub>3</sub>): δ 8.72 (ddd, *J* = 4.8, 1.8, 0.9 Hz, 2H), 8.65 (dt, *J* = 8.0, 1.1 Hz, 2H), 8.07 (s, *J* = 7.5 Hz, 2H), 7.89 (td, *J* = 7.7, 1.8 Hz, 2H), 7.37 (ddd, *J* = 7.5, 4.8, 1.2 Hz, 2H), 5.78 (s, 1H), 4.52 (m, 1H), 4.29 (dt, *J* = 9.9, 4.6 Hz, 2H), 2.20 (m, 2H), 1.64 (m, 2H), 1.32 (m, 12H), 0.87 (m, 3H); <sup>13</sup>C NMR (75 MHz, CDCl<sub>3</sub>): δ 172.68, 167.03, 155.73, 149.00, 136.99, 124.02, 121.44, 107.39, 70.88, 44.27, 36.95, 31.84, 29.44, 29.36, 29.28, 25.77, 22.66, 17.65, 14.11; HR-Mass (*m/z*) calculated for C<sub>28</sub>H<sub>36</sub>N<sub>4</sub>O<sub>2</sub> [M]<sup>+</sup> : 460.2838, Found [M]<sup>+</sup>: 460.2838.

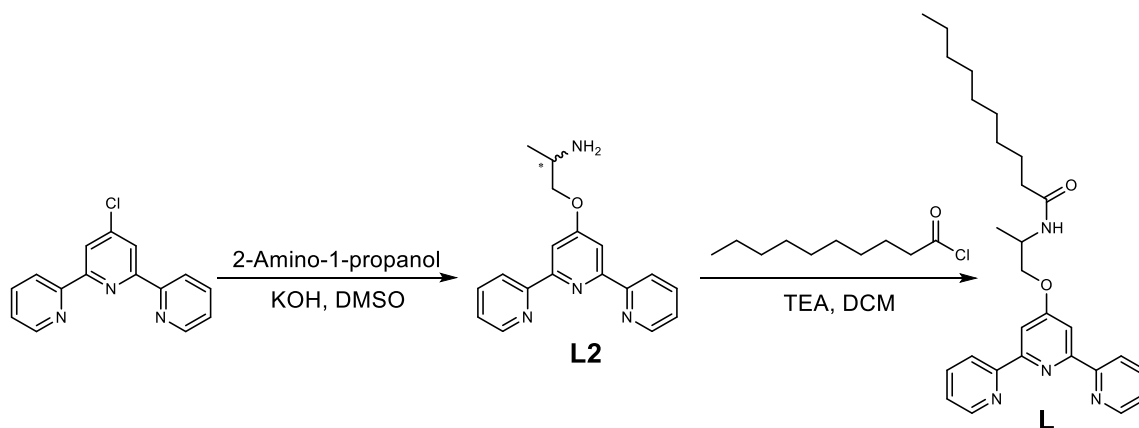

**Scheme S1** Synthetic method of **L**.

**Table S1.** Thermodynamic parameters of **L** with  $\text{AgNO}_3$  (A) 0 equiv., (B) 0.5 equiv. and (C) 1.0 equiv. in a mixture of DMSO/ $\text{H}_2\text{O}$  (1:1 v/v) after 72 h.

| $\text{AgNO}_3$ (equiv.) | $\Delta G$ ( $\text{kJ mol}^{-1}$ ) | $\Delta H_e$ ( $\text{kJ mol}^{-1}$ ) | $\Delta S$ ( $\text{J K}^{-1} \text{mol}^{-1}$ ) | $K_e$ ( $\text{L mol}^{-1}$ ) | $T_e$ (K) |
|--------------------------|-------------------------------------|---------------------------------------|--------------------------------------------------|-------------------------------|-----------|
| 0                        | -17.09                              | -174.98                               | -529.82                                          | $9.9 \times 10^2$             | 320.03    |
| 0.5                      | -14.52                              | -120.38                               | -355.22                                          | $4.5 \times 10^2$             | 307.61    |
| 1                        | -14.04                              | -145.63                               | -441.58                                          | $2.9 \times 10^2$             | 304.86    |

<sup>a</sup>Gibbs free energy. <sup>b</sup>Elongation enthalpy. <sup>c</sup>Entropy. <sup>d</sup>Elongation binding constant. <sup>e</sup>Elongation Temperature.

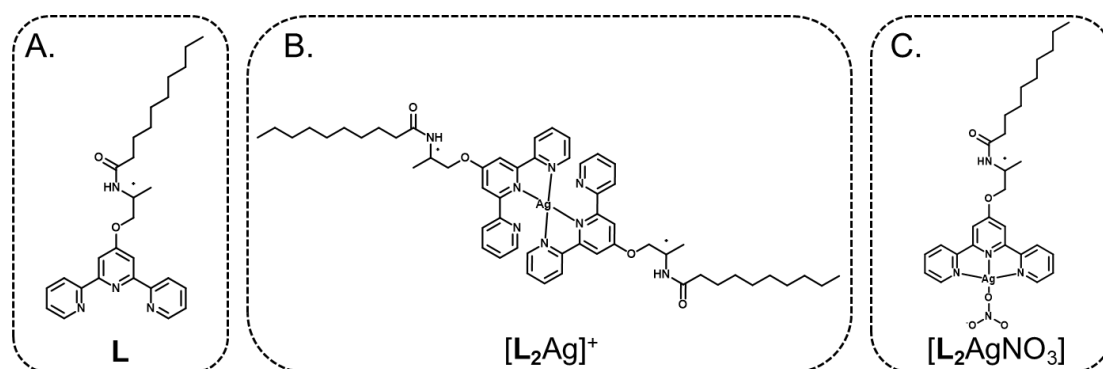

**Fig. S1** (A) Chemical structures of (A) ligand **L**. Proposed structures for complexes (B)  $[\text{L}_2\text{Ag}]^+$  and (C)  $[\text{L}_2\text{AgNO}_3]$ .

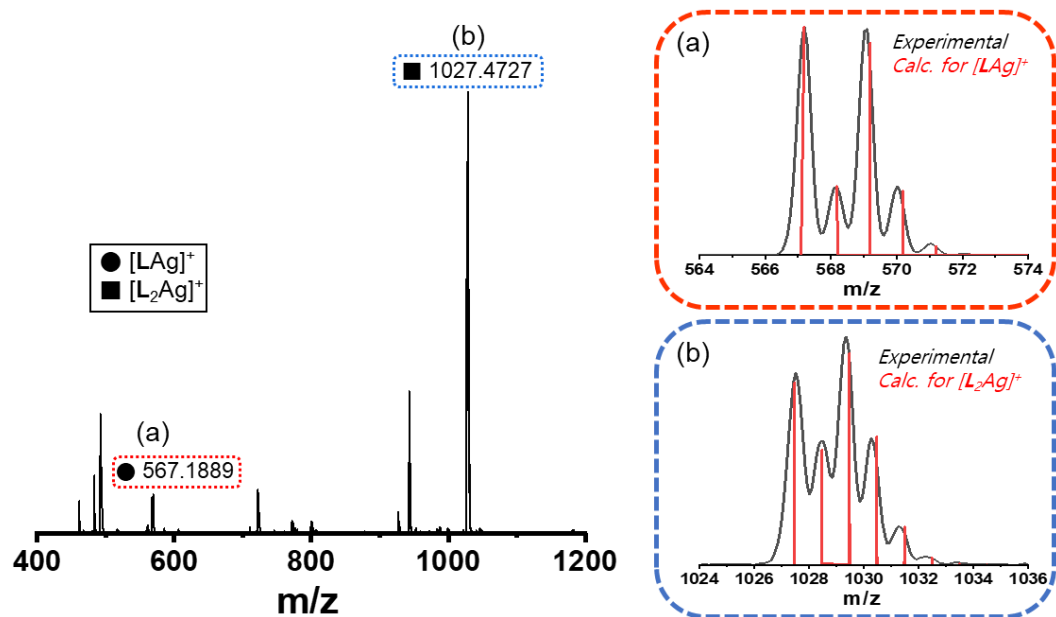

**Fig. S2** HR-ESI-MS spectrum of **L** (10.9 mM) with AgNO<sub>3</sub> 0.5 equiv. in a mixed H<sub>2</sub>O and DMSO (1:1 v/v) after 72 h.

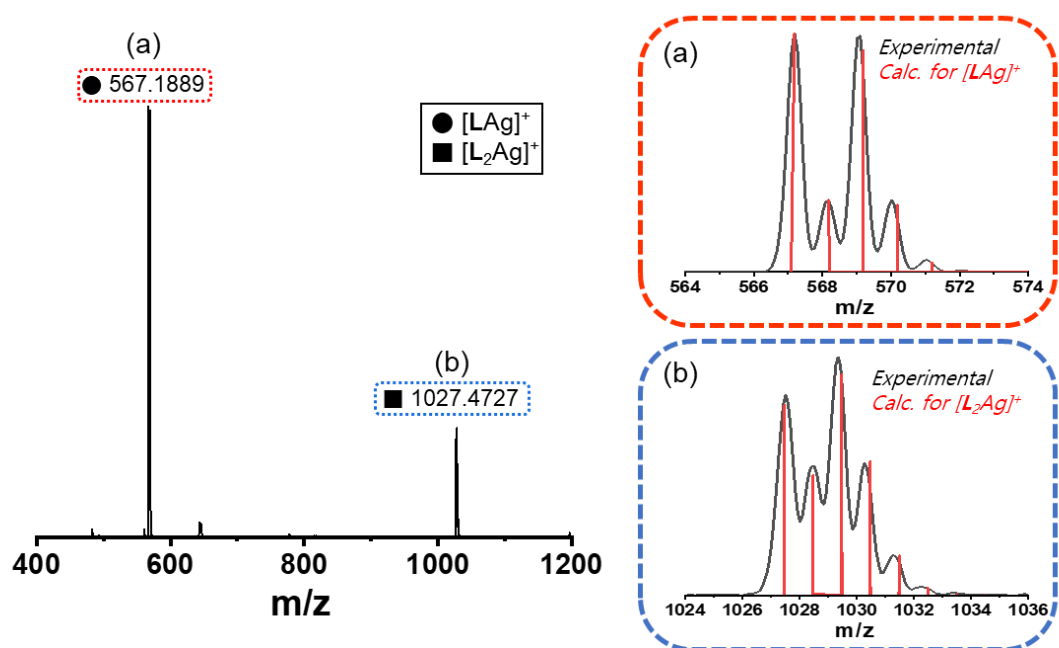

**Fig. S3** HR-ESI-MS spectrum of **L** (10.9 mM) with AgNO<sub>3</sub> 1.0 equiv. in a mixed H<sub>2</sub>O and DMSO (1:1 v/v) after 72 h.

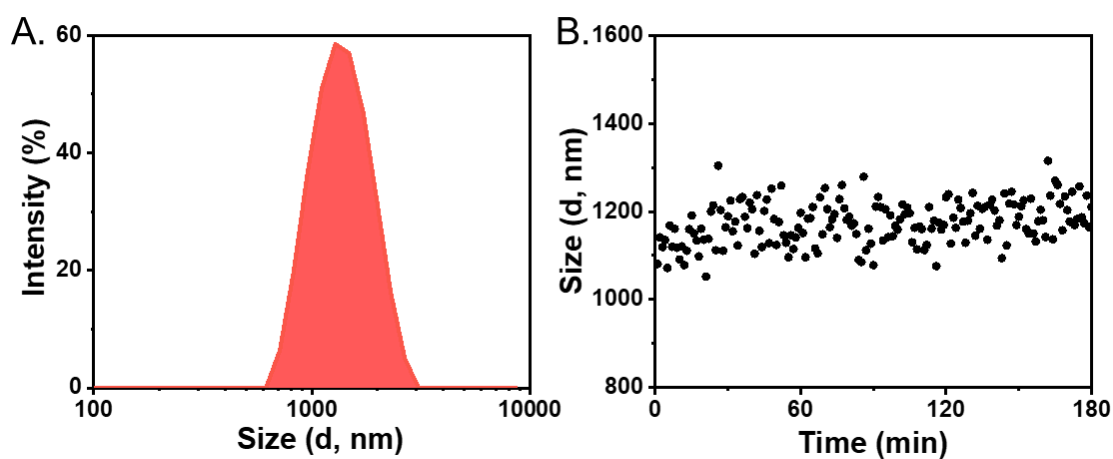

**Fig. S4** (A) DLS spectrum of of **L** (10.9 mM) with  $\text{AgNO}_3$  1.0 equiv. in a mixed  $\text{H}_2\text{O}$  and DMSO (1:1 v/v) after 72 h. (B) Plot of DLS spectra change of of **L** (10.9 mM) with  $\text{AgNO}_3$  1 equiv. in a mixture of  $\text{H}_2\text{O}$  and DMSO (1:1 v/v).

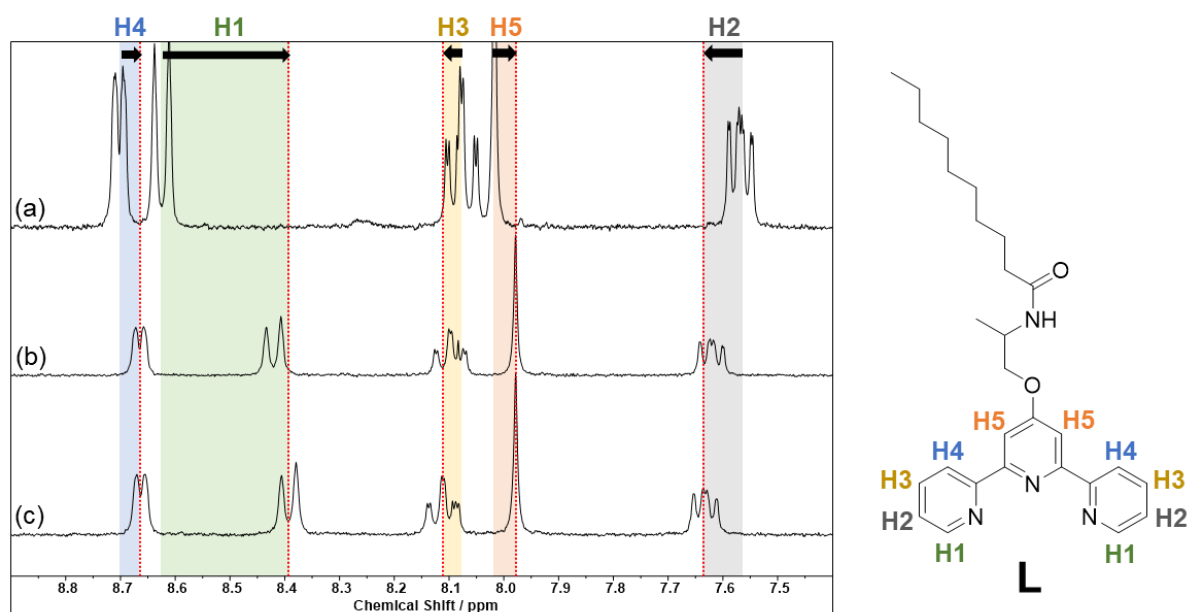

**Fig. S5**  $^1\text{H}$  NMR spectra of **L** with  $\text{AgNO}_3$  (A) 0 equiv., (B) 0.5 equiv. and (C) 1.0 equiv. in a mixture of  $\text{D}_2\text{O}$  and  $\text{DMSO-d}_6$  (1:1 v/v).

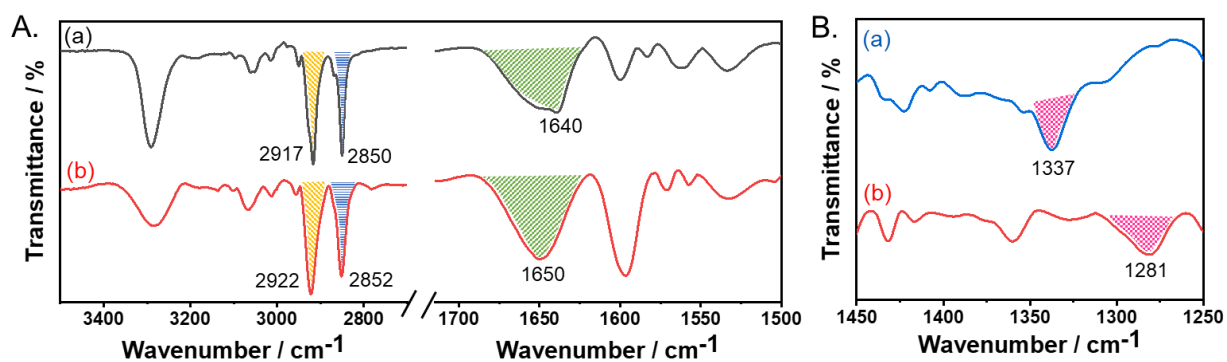

**Fig. S6** (A) FT-IR spectra of **L** with  $\text{AgNO}_3$  (a) 0.5 equiv. (black line) and (b) 1.0 equiv. (red line). (B) FT-IR spectra of (a)  $\text{AgNO}_3$  (blue line) and (b) 1.0 equiv. (red line).

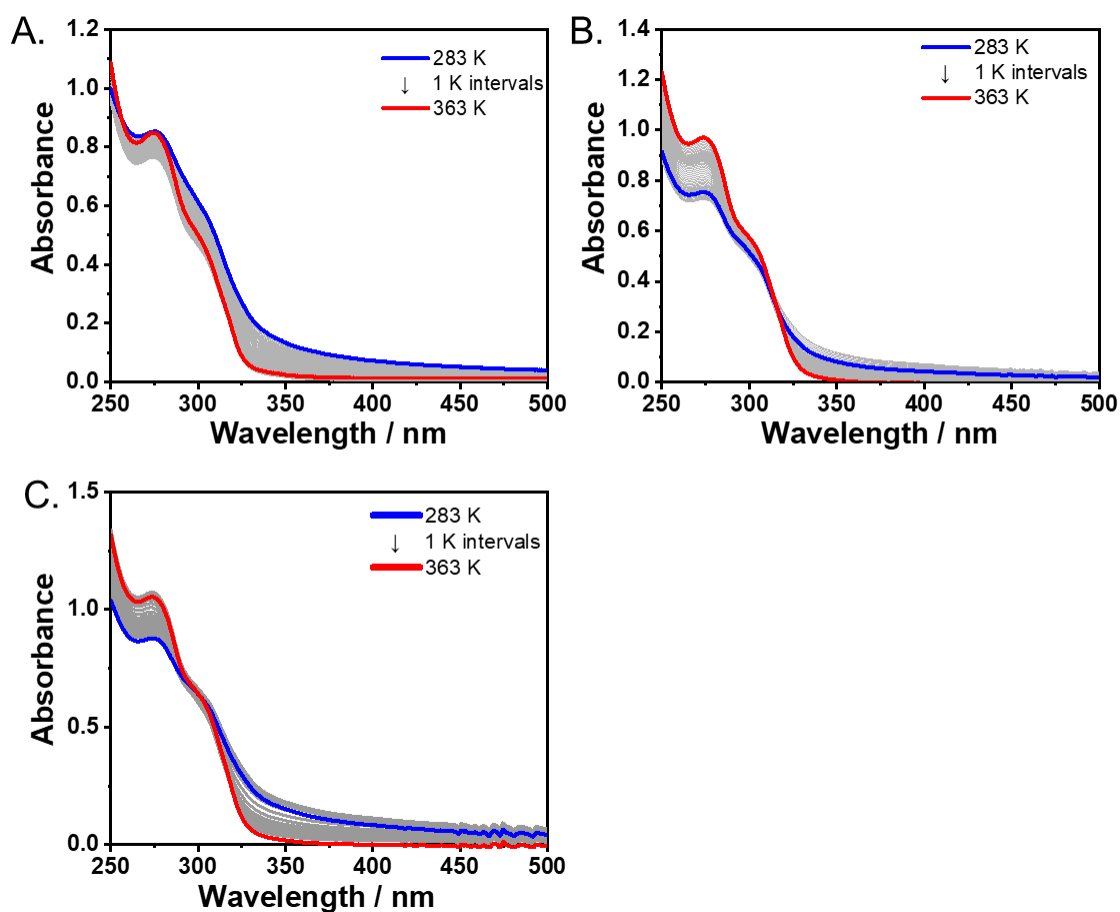

**Fig. S7** Temperature-dependent UV spectra of different concentrations of **L** with  $\text{AgNO}_3$  (A) 0 equiv., (B) 0.5 equiv. and (C) 1.0 equiv. in a mixture of DMSO/ $\text{H}_2\text{O}$  (1:1 v/v) after 72 h.

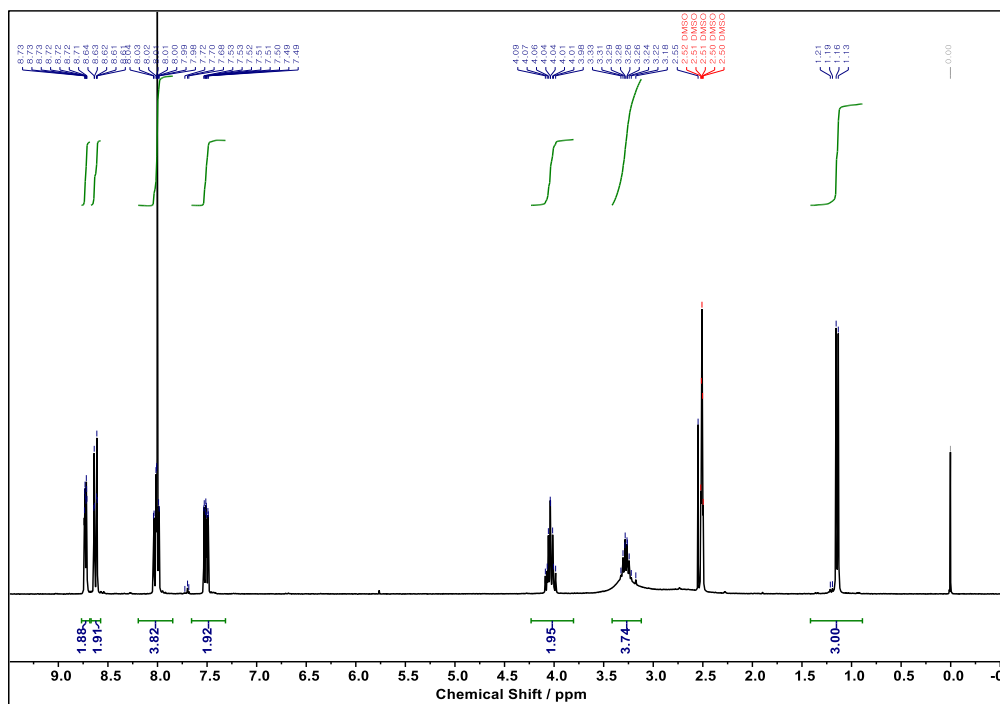

Fig. S8  $^1\text{H}$  NMR spectrum (300 MHz) of **L2** in  $\text{CDCl}_3$  at 25  $^\circ\text{C}$ .

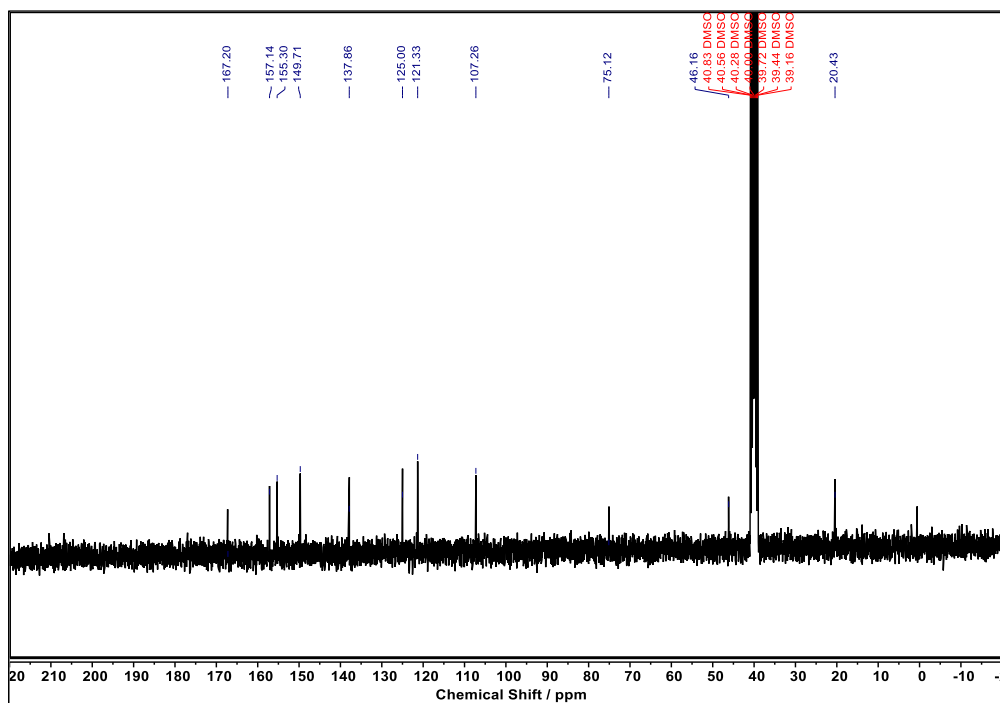

Fig. S9  $^{13}\text{C}$  NMR spectrum (125 MHz) of **L2** in  $\text{DMSO}-d_6$  at 25  $^\circ\text{C}$ .



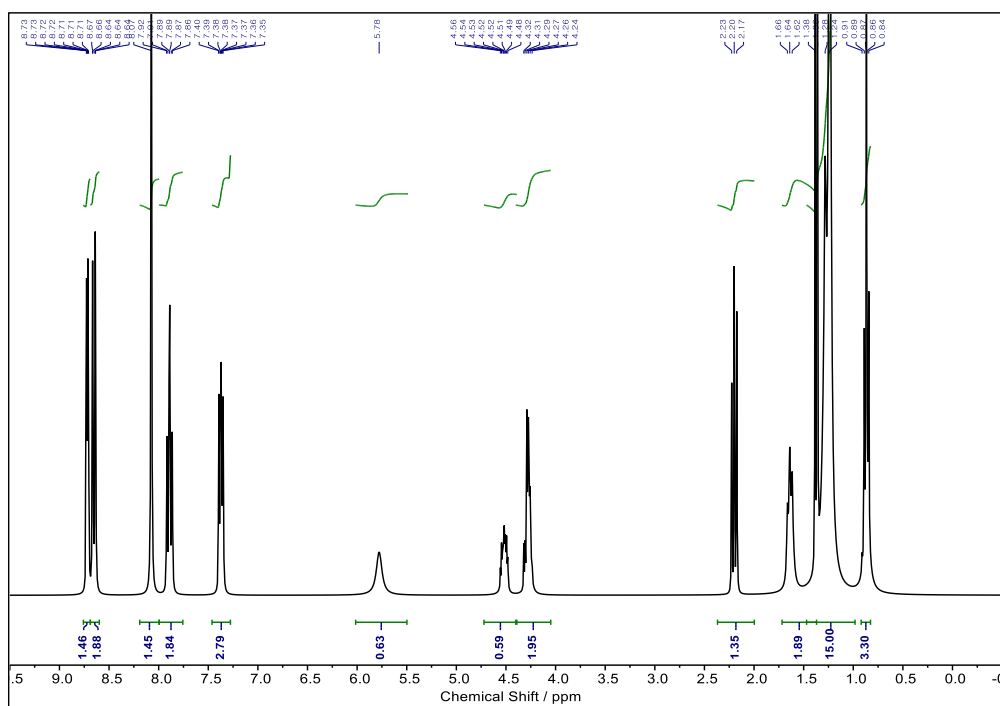

Fig. S10  $^1\text{H}$  NMR spectrum (300 MHz) of **L** in  $\text{CDCl}_3$  at 25  $^\circ\text{C}$ .

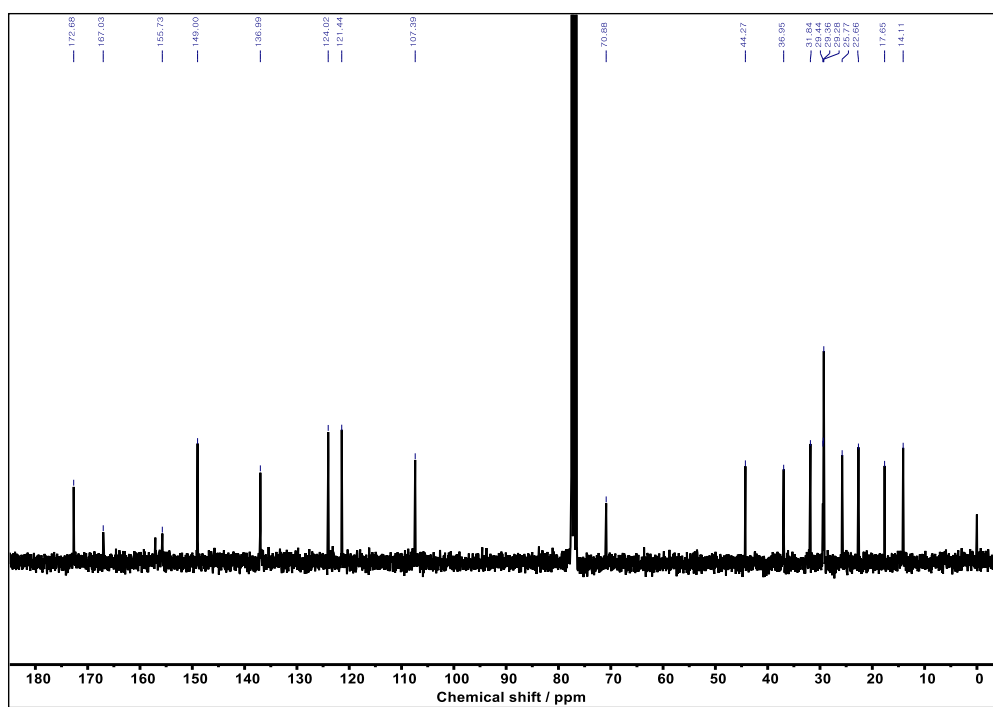

Fig. S11  $^{13}\text{C}$  NMR spectrum (75 MHz) of **L** in  $\text{CDCl}_3$  at 25  $^\circ\text{C}$ .

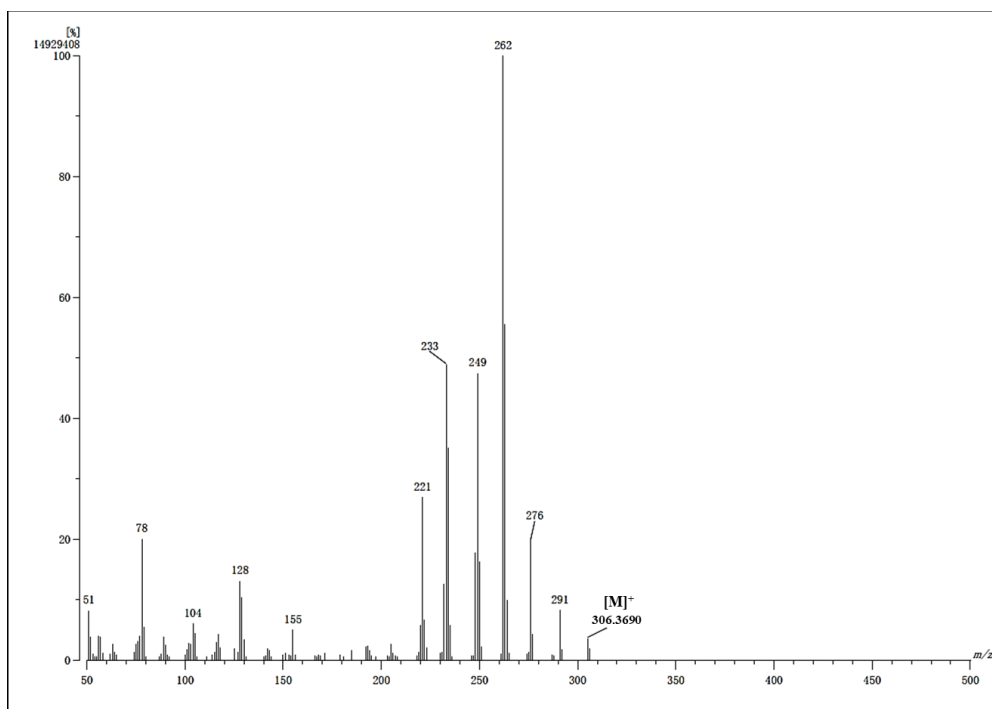

**Fig. S12** HR EI-MS spectrum of **L2** in MeOH.

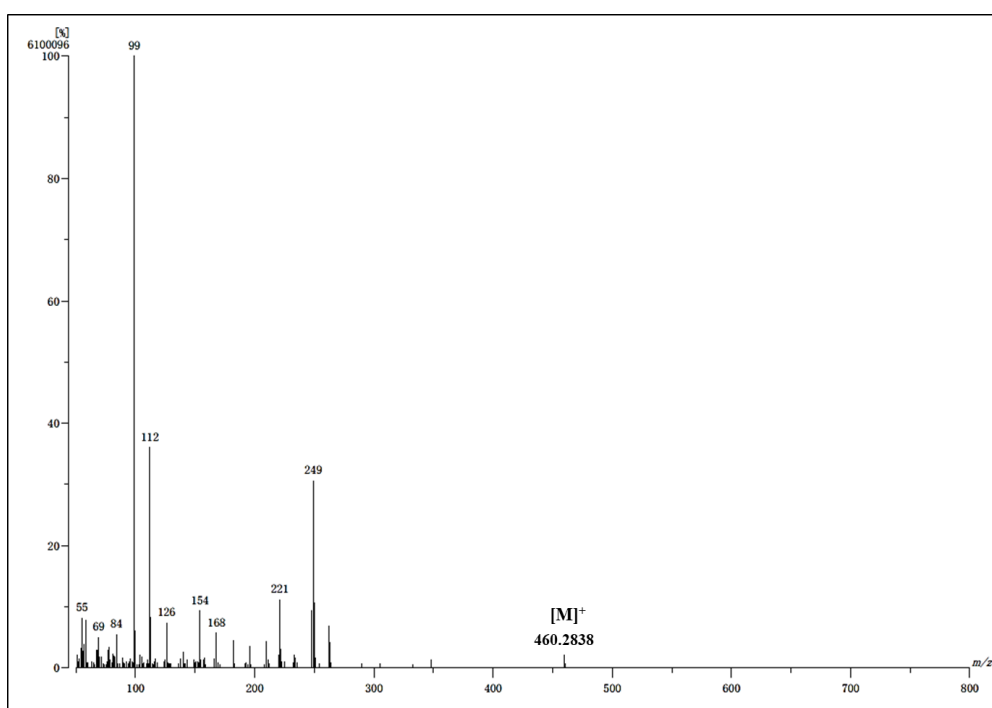

**Fig. S13** HR EI-MS spectrum of **L** in MeOH.

## References

1. H. M. M. ten Eikelder, A. J. Markvoort, T. F. A. de Greef and P. A. J. Hilbers, *J. Phys. Chem. B*, 2012, **116**, 5291-5301.
2. M. M. J. Smulders, M. M. L. Nieuwenhuizen, T. F. A. de Greef, P. van der Schoot, A. P. H. J. Schenning and E. W. Meijer, *Chem. Eur. J.*, 2010, **16**, 362-367.
3. H. Choi, S. Ogi, N. Ando and S. Yamaguchi, *J. Am. Chem. Soc.*, 2021, **143**, 2953-2961.
4. M. H.-Y. Chan, M. Ng, S. Y.-L. Leung, W. H. Lam and V. W.-W. Yam, *J. Am. Chem. Soc.*, 2017, **139**, 8639-8645.
